# Supplementary material for: Stereolithography Apparatus Evolution: Enhancing Throughput and Efficiency of Pharmaceutical Formulation Development
Source: MDPI journal article supplement (doi:10.3390/pharmaceutics13050616), 2021-04-25
Supplement: s1 [file s1]

# Supplementary Materials: Stereolithography Apparatus Evolution: Enhancing Throughput and Efficiency of Pharmaceutical Formulation Development

Carlo Curti, Daniel J. Kirby and Craig A. Russell \*

**Citation:** Curti, C.; Hussain, T.; Kirby, D.J.; Russell, C.A. Stereolithography Apparatus Evolution: Enhancing Throughput and Efficiency of Pharmaceutical Formulation Development. *Pharmaceutics* **2021**, *13*, 616.  
<https://doi.org/10.3390/pharmaceutics13050616>

Academic Editor: Natalja Genina

Received: 29 March 2021

Accepted: 21 April 2021

Published: 12 May 2021

**Publisher's Note:** MDPI stays neutral with regard to jurisdictional claims in published maps and institutional affiliations.

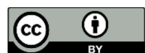

**Copyright:** © 2021 by the author. Licensee MDPI, Basel, Switzerland. This article is an open access article distributed under the terms and conditions of the Creative Commons Attribution (CC BY) license (<http://creativecommons.org/licenses/by/4.0/>).

**Table S1.** % *w/w* composition of the 156 photopolymer formulations prepared and screened. Printability score assigned per formulation at each tested printing resolution and the classification group of each formulation are reported. Costs/mL per formulation are described in the right column.

|     | PEGDA<br>250 | PEGDA<br>575 | PEGDA<br>700 | PEG 300 | Propylene<br>Glycol | Glycerol | N-Vinyl<br>Pyrrolidone | TPO  | PS @ 25<br>µm | PS @ 50<br>µm | PS @<br>100 µm | Group<br>assigned | Cost<br>(£/mL) |
|-----|--------------|--------------|--------------|---------|---------------------|----------|------------------------|------|---------------|---------------|----------------|-------------------|----------------|
| F1  | 99.00        | -            | -            | -       | -                   | -        | -                      | 1.00 | 5*            | 5*            | 6              | B1                | 0.25           |
| F2  | 99.50        | -            | -            | -       | -                   | -        | -                      | 0.50 | 5*            | 5*            | 6              | B1                | 0.23           |
| F3  | 99.90        | -            | -            | -       | -                   | -        | -                      | 0.10 | 4             | 5             | 5*             | B1                | 0.21           |
| F4  | 99.95        | -            | -            | -       | -                   | -        | -                      | 0.05 | 4             | 4             | 4              | A                 | 0.21           |
| F5  | -            | 99.00        | -            | -       | -                   | -        | -                      | 1.00 | 6             | 6             | 6              | A                 | 0.24           |
| F6  | -            | 99.50        | -            | -       | -                   | -        | -                      | 0.50 | 6             | 6             | 6              | A                 | 0.22           |
| F7  | -            | 99.90        | -            | -       | -                   | -        | -                      | 0.10 | 5 *           | 6 *           | 6 *            | B1                | 0.20           |
| F8  | -            | 99.95        | -            | -       | -                   | -        | -                      | 0.05 | 4             | 6             | 6              | A                 | 0.20           |
| F9  | -            | -            | 99.00        | -       | -                   | -        | -                      | 1.00 | 6             | 6             | 6              | A                 | 0.24           |
| F10 | -            | -            | 99.50        | -       | -                   | -        | -                      | 0.50 | 6             | 6             | 6              | A                 | 0.22           |
| F11 | -            | -            | 99.90        | -       | -                   | -        | -                      | 0.10 | 5*            | 6*            | 6              | B1                | 0.20           |
| F12 | -            | -            | 99.95        | -       | -                   | -        | -                      | 0.05 | 5*            | 6*            | 5*             | B1                | 0.20           |
| F13 | 86.50        | -            | -            | 12.50   | -                   | -        | -                      | 1.00 | 5*            | 6             | 6              | B1                | 0.23           |
| F14 | 74.00        | -            | -            | 25.00   | -                   | -        | -                      | 1.00 | 6             | 6             | 6              | A                 | 0.21           |
| F15 | 49.00        | -            | -            | 50.00   | -                   | -        | -                      | 1.00 | 6             | 6             | 6              | A                 | 0.18           |
| F16 | 87.00        | -            | -            | 12.50   | -                   | -        | -                      | 0.50 | 6             | 6             | 6              | A                 | 0.21           |
| F17 | 74.50        | -            | -            | 25.00   | -                   | -        | -                      | 0.50 | 6             | 6             | 6              | A                 | 0.19           |
| F18 | 49.50        | -            | -            | 50.00   | -                   | -        | -                      | 0.50 | 6             | 6             | 6              | A                 | 0.16           |
| F19 | 87.40        | -            | -            | 12.50   | -                   | -        | -                      | 0.10 | 5             | 5 *           | 5 *            | B1                | 0.19           |
| F20 | 74.90        | -            | -            | 25.00   | -                   | -        | -                      | 0.10 | 6             | 6             | 6              | A                 | 0.17           |
| F21 | 49.90        | -            | -            | 50.00   | -                   | -        | -                      | 0.10 | 6             | 6             | 6              | A                 | 0.14           |
| F22 | 87.45        | -            | -            | 12.50   | -                   | -        | -                      | 0.05 | 4             | 4             | 4              | A                 | 0.19           |
| F23 | 74.95        | -            | -            | 25.00   | -                   | -        | -                      | 0.05 | 6             | 6             | 6*             | B                 | 0.17           |
| F24 | 49.95        | -            | -            | 50.00   | -                   | -        | -                      | 0.05 | 6             | 6             | 6              | A                 | 0.14           |
| F25 | -            | 86.50        | -            | 12.50   | -                   | -        | -                      | 1.00 | 6             | 6             | 6*             | B                 | 0.23           |
| F26 | -            | 74.00        | -            | 25.00   | -                   | -        | -                      | 1.00 | 6             | 6             | 6              | A                 | 0.21           |
| F27 | -            | 49.00        | -            | 50.00   | -                   | -        | -                      | 1.00 | 6             | 6             | 6              | A                 | 0.18           |
| F28 | -            | 87.00        | -            | 12.50   | -                   | -        | -                      | 0.50 | 6             | 6             | 6              | A                 | 0.20           |

|     |   |       |       |       |       |   |   |      |     |     |     |    |      |
|-----|---|-------|-------|-------|-------|---|---|------|-----|-----|-----|----|------|
| F29 | - | 74.50 | -     | 25.00 | -     | - | - | 0.50 | 6   | 6*  | 6   | B  | 0.19 |
| F30 | - | 49.50 | -     | 50.00 | -     | - | - | 0.50 | 6   | 6   | 6   | A  | 0.15 |
| F31 | - | 87.40 | -     | 12.50 | -     | - | - | 0.10 | 6*  | 6   | 6*  | B  | 0.19 |
| F32 | - | 74.90 | -     | 25.00 | -     | - | - | 0.10 | 6   | 6   | 6   | A  | 0.17 |
| F33 | - | 49.90 | -     | 50.00 | -     | - | - | 0.10 | 6   | 6   | 6   | A  | 0.14 |
| F34 | - | 87.45 | -     | 12.50 | -     | - | - | 0.05 | 5   | 5 * | 5 * | B1 | 0.18 |
| F35 | - | 74.95 | -     | 25.00 | -     | - | - | 0.05 | 5 * | 6   | 5 * | B1 | 0.17 |
| F36 | - | 49.95 | -     | 50.00 | -     | - | - | 0.05 | 6   | 6   | 6   | A  | 0.13 |
| F37 | - | -     | 86.50 | 12.50 | -     | - | - | 1.00 | 6   | 6   | 6   | A  | 0.23 |
| F38 | - | -     | 74.00 | 25.00 | -     | - | - | 1.00 | 6   | 6   | 6   | A  | 0.21 |
| F39 | - | -     | 49.00 | 50.00 | -     | - | - | 1.00 | 6   | 6   | 6   | A  | 0.18 |
| F40 | - | -     | 87.00 | 12.50 | -     | - | - | 0.50 | 6   | 6   | 6   | A  | 0.20 |
| F41 | - | -     | 74.50 | 25.00 | -     | - | - | 0.50 | 6   | 6   | 6   | A  | 0.19 |
| F42 | - | -     | 49.50 | 50.00 | -     | - | - | 0.50 | 6   | 6   | 6   | A  | 0.15 |
| F43 | - | -     | 87.40 | 12.50 | -     | - | - | 0.10 | 6   | 6   | 6   | A  | 0.19 |
| F44 | - | -     | 74.90 | 25.00 | -     | - | - | 0.10 | 6   | 6   | 6   | A  | 0.17 |
| F45 | - | -     | 49.90 | 50.00 | -     | - | - | 0.10 | 6   | 6   | 6   | A  | 0.14 |
| F46 | - | -     | 87.45 | 12.50 | -     | - | - | 0.05 | 5 * | 5 * | 5 * | B2 | 0.18 |
| F47 | - | -     | 74.95 | 25.00 | -     | - | - | 0.05 | 6   | 6   | 6   | A  | 0.17 |
| F48 | - | -     | 49.95 | 50.00 | -     | - | - | 0.05 | 6   | 6   | 6   | A  | 0.13 |
| F49 | - | 86.50 | -     | -     | 12.50 | - | - | 1.00 | 6   | 6   | 6   | A  | 0.22 |
| F50 | - | 74.00 | -     | -     | 25.00 | - | - | 1.00 | 6   | 6   | 6   | A  | 0.20 |
| F51 | - | 49.00 | -     | -     | 50.00 | - | - | 1.00 | 6   | 6   | 6   | A  | 0.17 |
| F52 | - | 87.00 | -     | -     | 12.50 | - | - | 0.50 | 6   | 6   | 6   | A  | 0.20 |
| F53 | - | 74.50 | -     | -     | 25.00 | - | - | 0.50 | 6   | 6   | 6   | A  | 0.18 |
| F54 | - | 49.50 | -     | -     | 50.00 | - | - | 0.50 | 6   | 6   | 6   | A  | 0.14 |
| F55 | - | 87.40 | -     | -     | 12.50 | - | - | 0.10 | 6 * | 6 * | 6 * | B  | 0.18 |
| F56 | - | 74.90 | -     | -     | 25.00 | - | - | 0.10 | 6 * | 6   | 6   | B  | 0.16 |
| F57 | - | 49.90 | -     | -     | 50.00 | - | - | 0.10 | 6 * | 6   | 6   | B  | 0.13 |
| F58 | - | 87.45 | -     | -     | 12.50 | - | - | 0.05 | 4   | 4   | 5 * | B1 | 0.18 |
| F59 | - | 74.95 | -     | -     | 25.00 | - | - | 0.05 | 4   | 4   | 5 * | B1 | 0.16 |
| F60 | - | 49.95 | -     | -     | 50.00 | - | - | 0.05 | 4   | 5   | 5 * | B1 | 0.12 |
| F61 | - | -     | 86.50 | -     | 12.50 | - | - | 1.00 | 6   | 6   | 6   | A  | 0.22 |
| F62 | - | -     | 74.00 | -     | 25.00 | - | - | 1.00 | 6   | 6   | 6   | A  | 0.20 |

|     |   |       |       |   |       |       |   |      |     |     |     |    |      |
|-----|---|-------|-------|---|-------|-------|---|------|-----|-----|-----|----|------|
| F63 | - | -     | 49.00 | - | 50.00 | -     | - | 1.00 | 6   | 6   | 6   | A  | 0.16 |
| F64 | - | -     | 87.00 | - | 12.50 | -     | - | 0.50 | 6   | 6   | 6   | A  | 0.20 |
| F65 | - | -     | 74.50 | - | 25.00 | -     | - | 0.50 | 6   | 6   | 6   | A  | 0.18 |
| F66 | - | -     | 49.50 | - | 50.00 | -     | - | 0.50 | 6   | 6   | 6   | A  | 0.14 |
| F67 | - | -     | 87.40 | - | 12.50 | -     | - | 0.10 | 6*  | 6   | 6   | B  | 0.18 |
| F68 | - | -     | 74.90 | - | 25.00 | -     | - | 0.10 | 6   | 6   | 6   | A  | 0.16 |
| F69 | - | -     | 49.90 | - | 50.00 | -     | - | 0.10 | 6   | 6   | 6   | A  | 0.12 |
| F70 | - | -     | 87.45 | - | 12.50 | -     | - | 0.05 | 5*  | 5*  | 5*  | B2 | 0.18 |
| F71 | - | -     | 74.95 | - | 25.00 | -     | - | 0.05 | 5*  | 5   | 5   | B1 | 0.16 |
| F72 | - | -     | 49.95 | - | 50.00 | -     | - | 0.05 | 5*  | 5   | 5   | B1 | 0.12 |
| F73 | - | 86.50 | -     | - | -     | 12.50 | - | 1.00 | 6   | 6   | 6   | A  | 0.23 |
| F74 | - | 74.00 | -     | - | -     | 25.00 | - | 1.00 | 6   | 6   | 6   | A  | 0.21 |
| F75 | - | 49.00 | -     | - | -     | 50.00 | - | 1.00 | 6   | 6   | 6   | A  | 0.18 |
| F76 | - | 87.00 | -     | - | -     | 12.50 | - | 0.50 | 6 * | 6   | 6   | B  | 0.21 |
| F77 | - | 74.50 | -     | - | -     | 25.00 | - | 0.50 | 6   | 6   | 6   | A  | 0.19 |
| F78 | - | 49.50 | -     | - | -     | 50.00 | - | 0.50 | 6   | 6   | 6   | A  | 0.16 |
| F79 | - | 87.40 | -     | - | -     | 12.50 | - | 0.10 | 5 * | 6   | 4   | B1 | 0.19 |
| F80 | - | 74.90 | -     | - | -     | 25.00 | - | 0.10 | 6 * | 6   | 6   | B  | 0.17 |
| F81 | - | 49.90 | -     | - | -     | 50.00 | - | 0.10 | 6 * | 6 * | 6   | B  | 0.14 |
| F82 | - | 87.45 | -     | - | -     | 12.50 | - | 0.05 | 4   | 5 * | 6   | B1 | 0.19 |
| F83 | - | 74.95 | -     | - | -     | 25.00 | - | 0.05 | 4   | 5 * | 5 * | B1 | 0.17 |
| F84 | - | 49.95 | -     | - | -     | 50.00 | - | 0.05 | 5 * | 5 * | 5 * | B2 | 0.14 |
| F85 | - | -     | 86.50 | - | -     | 12.50 | - | 1.00 | 6   | 6   | 6   | A  | 0.22 |
| F86 | - | -     | 74.00 | - | -     | 25.00 | - | 1.00 | 6   | 6   | 6   | A  | 0.21 |
| F87 | - | -     | 49.00 | - | -     | 50.00 | - | 1.00 | 6   | 6   | 6   | A  | 0.18 |
| F88 | - | -     | 87.00 | - | -     | 12.50 | - | 0.50 | 6   | 6   | 6   | A  | 0.20 |
| F89 | - | -     | 74.50 | - | -     | 25.00 | - | 0.50 | 6   | 6   | 6   | A  | 0.19 |
| F90 | - | -     | 49.50 | - | -     | 50.00 | - | 0.50 | 6   | 6   | 6   | A  | 0.16 |
| F91 | - | -     | 87.40 | - | -     | 12.50 | - | 0.10 | 6*  | 6   | 6   | B  | 0.18 |
| F92 | - | -     | 74.90 | - | -     | 25.00 | - | 0.10 | 6   | 6   | 6   | A  | 0.17 |
| F93 | - | -     | 49.90 | - | -     | 50.00 | - | 0.10 | 6   | 6   | 6   | A  | 0.14 |
| F94 | - | -     | 87.45 | - | -     | 12.50 | - | 0.05 | 5*  | 6   | 6   | B1 | 0.18 |
| F95 | - | -     | 74.95 | - | -     | 25.00 | - | 0.05 | 5*  | 6   | 6   | B1 | 0.17 |
| F96 | - | -     | 49.95 | - | -     | 50.00 | - | 0.05 | 6   | 6   | 6   | A  | 0.14 |

|      |       |       |       |   |   |   |       |      |     |     |     |    |      |
|------|-------|-------|-------|---|---|---|-------|------|-----|-----|-----|----|------|
| F97  | -     | -     | 94.00 | - | - | - | 5.00  | 1.00 | 6   | 6   | 6   | A  | 0.23 |
| F98  | -     | -     | 89.00 | - | - | - | 10.00 | 1.00 | 6   | 6   | 6   | A  | 0.23 |
| F99  | -     | -     | 79.00 | - | - | - | 20.00 | 1.00 | 6   | 6   | 6   | A  | 0.22 |
| F100 | -     | -     | 94.50 | - | - | - | 5.00  | 0.50 | 6   | 6   | 6   | A  | 0.21 |
| F101 | -     | -     | 89.50 | - | - | - | 10.00 | 0.50 | 6   | 6   | 6   | A  | 0.21 |
| F102 | -     | -     | 79.50 | - | - | - | 20.00 | 0.50 | 6   | 6   | 6   | A  | 0.20 |
| F103 | -     | -     | 94.90 | - | - | - | 5.00  | 0.10 | 6   | 6   | 6   | A  | 0.19 |
| F104 | -     | -     | 89.90 | - | - | - | 10.00 | 0.10 | 6   | 6   | 6   | A  | 0.19 |
| F105 | -     | -     | 79.90 | - | - | - | 20.00 | 0.10 | 6   | 6   | 6   | A  | 0.18 |
| F106 | -     | -     | 94.95 | - | - | - | 5.00  | 0.05 | 6   | 6   | 6   | A  | 0.19 |
| F107 | -     | -     | 89.95 | - | - | - | 10.00 | 0.05 | 6   | 6   | 6   | A  | 0.19 |
| F108 | -     | -     | 79.95 | - | - | - | 20.00 | 0.05 | 6   | 6   | 6   | A  | 0.18 |
| F109 | -     | 94.00 | -     | - | - | - | 5.00  | 1.00 | 6   | 6   | 6   | A  | 0.24 |
| F110 | -     | 89.00 | -     | - | - | - | 10.00 | 1.00 | 6   | 6   | 6   | A  | 0.24 |
| F111 | -     | 79.00 | -     | - | - | - | 20.00 | 1.00 | 6   | 6   | 6   | A  | 0.23 |
| F112 | -     | 94.50 | -     | - | - | - | 5.00  | 0.50 | 6   | 6   | 6   | A  | 0.22 |
| F113 | -     | 89.50 | -     | - | - | - | 10.00 | 0.50 | 6   | 6   | 6   | A  | 0.21 |
| F114 | -     | 79.50 | -     | - | - | - | 20.00 | 0.50 | 6   | 6 * | 6   | B  | 0.20 |
| F115 | -     | 94.90 | -     | - | - | - | 5.00  | 0.10 | 5 * | 6   | 6   | B1 | 0.20 |
| F116 | -     | 89.90 | -     | - | - | - | 10.00 | 0.10 | 6   | 6   | 6   | A  | 0.20 |
| F117 | -     | 79.90 | -     | - | - | - | 20.00 | 0.10 | 6   | 6   | 6   | A  | 0.19 |
| F118 | -     | 94.95 | -     | - | - | - | 5.00  | 0.05 | 5 * | 6   | 5 * | B1 | 0.20 |
| F119 | -     | 89.95 | -     | - | - | - | 10.00 | 0.05 | 6 * | 6   | 6   | B  | 0.19 |
| F120 | -     | 79.95 | -     | - | - | - | 20.00 | 0.05 | 6   | 5 * | 6   | B1 | 0.18 |
| F121 | 94.00 | -     | -     | - | - | - | 5.00  | 1.00 | 6   | 6   | 6   | A  | 0.24 |
| F122 | 89.00 | -     | -     | - | - | - | 10.00 | 1.00 | 6   | 6   | 6   | A  | 0.24 |
| F123 | 79.00 | -     | -     | - | - | - | 20.00 | 1.00 | 6   | 6   | 6   | A  | 0.23 |
| F124 | 94.50 | -     | -     | - | - | - | 5.00  | 0.50 | 6 * | 6 * | 6   | B  | 0.22 |
| F125 | 89.50 | -     | -     | - | - | - | 10.00 | 0.50 | 6   | 6   | 6   | A  | 0.22 |
| F126 | 79.50 | -     | -     | - | - | - | 20.00 | 0.50 | 6   | 6   | 6   | A  | 0.21 |
| F127 | 94.90 | -     | -     | - | - | - | 5.00  | 0.10 | 5 * | 5   | 6 * | B1 | 0.20 |
| F128 | 89.90 | -     | -     | - | - | - | 10.00 | 0.10 | 6   | 6   | 6   | A  | 0.20 |
| F129 | 79.90 | -     | -     | - | - | - | 20.00 | 0.10 | 6   | 6   | 6   | A  | 0.19 |
| F130 | 94.95 | -     | -     | - | - | - | 5.00  | 0.05 | 4   | 5 * | 5 * | B1 | 0.20 |

---

|             |       |   |   |   |       |       |       |      |     |     |     |    |      |
|-------------|-------|---|---|---|-------|-------|-------|------|-----|-----|-----|----|------|
| <b>F131</b> | 89.95 | - | - | - | -     | -     | 10.00 | 0.05 | 4   | 4   | 5 * | B1 | 0.20 |
| <b>F132</b> | 79.95 | - | - | - | -     | -     | 20.00 | 0.05 | 6   | 6   | 6   | A  | 0.19 |
| <b>F133</b> | 86.50 | - | - | - | -     | 12.50 | -     | 1.00 | 5 * | 5 * | 4   | B1 | 0.23 |
| <b>F134</b> | 74.00 | - | - | - | -     | 25.00 | -     | 1.00 | 6 * | 6 * | 6 * | B  | 0.22 |
| <b>F135</b> | 49.00 | - | - | - | -     | 50.00 | -     | 1.00 | 6 * | 4   | 4   | B  | 0.18 |
| <b>F136</b> | 87.00 | - | - | - | -     | 12.50 | -     | 0.50 | 5 * | 5 * | 5 * | B2 | 0.21 |
| <b>F137</b> | 74.50 | - | - | - | -     | 25.00 | -     | 0.50 | 5 * | 6 * | 6   | B1 | 0.19 |
| <b>F138</b> | 49.50 | - | - | - | -     | 50.00 | -     | 0.50 | 5 * | 6 * | 6   | B1 | 0.16 |
| <b>F139</b> | 87.40 | - | - | - | -     | 12.50 | -     | 0.10 | 5 * | 5 * | 5 * | B2 | 0.19 |
| <b>F140</b> | 74.90 | - | - | - | -     | 25.00 | -     | 0.10 | 4   | 5 * | 5 * | B1 | 0.18 |
| <b>F141</b> | 49.90 | - | - | - | -     | 50.00 | -     | 0.10 | 5 * | 5 * | 6 * | B1 | 0.14 |
| <b>F142</b> | 87.45 | - | - | - | -     | 12.50 | -     | 0.05 | 4   | 4   | 4   | A  | 0.19 |
| <b>F143</b> | 74.95 | - | - | - | -     | 25.00 | -     | 0.05 | 4   | 4   | 5   | B  | 0.17 |
| <b>F144</b> | 49.95 | - | - | - | -     | 50.00 | -     | 0.05 | 4   | 5   | 4   | B  | 0.14 |
| <b>F145</b> | 86.50 | - | - | - | 12.50 | -     | -     | 1.00 | 5 * | 6 * | 6 * | B1 | 0.23 |
| <b>F146</b> | 74.00 | - | - | - | 25.00 | -     | -     | 1.00 | 6   | 6   | 6   | A  | 0.21 |
| <b>F147</b> | 49.00 | - | - | - | 50.00 | -     | -     | 1.00 | 4   | 6   | 4   | A  | 0.17 |
| <b>F148</b> | 87.00 | - | - | - | 12.50 | -     | -     | 0.50 | 5 * | 5 * | 6 * | B1 | 0.21 |
| <b>F149</b> | 74.50 | - | - | - | 25.00 | -     | -     | 0.50 | 6   | 6   | 6   | A  | 0.19 |
| <b>F150</b> | 49.50 | - | - | - | 50.00 | -     | -     | 0.50 | 6   | 6   | 6   | A  | 0.14 |
| <b>F151</b> | 87.40 | - | - | - | 12.50 | -     | -     | 0.10 | 5   | 5 * | 5 * | B1 | 0.19 |
| <b>F152</b> | 74.90 | - | - | - | 25.00 | -     | -     | 0.10 | 6 * | 4   | 6   | B  | 0.17 |
| <b>F153</b> | 49.90 | - | - | - | 50.00 | -     | -     | 0.10 | 6   | 6   | 6   | A  | 0.13 |
| <b>F154</b> | 87.45 | - | - | - | 12.50 | -     | -     | 0.05 | 4   | 4   | 4   | A  | 0.19 |
| <b>F155</b> | 74.95 | - | - | - | 25.00 | -     | -     | 0.05 | 4   | 6   | 4   | A  | 0.17 |
| <b>F156</b> | 49.95 | - | - | - | 50.00 | -     | -     | 0.05 | 4   | 5   | 5 * | B1 | 0.12 |

---
